# Supplementary material
Source: Springer Nature journal article supplement (https://www.springermedizin.de/resource/supplementary/12931_2011_1156_MOESM2_ESM.pdf/9425424)

WT/OVA

KO/OVA

HE

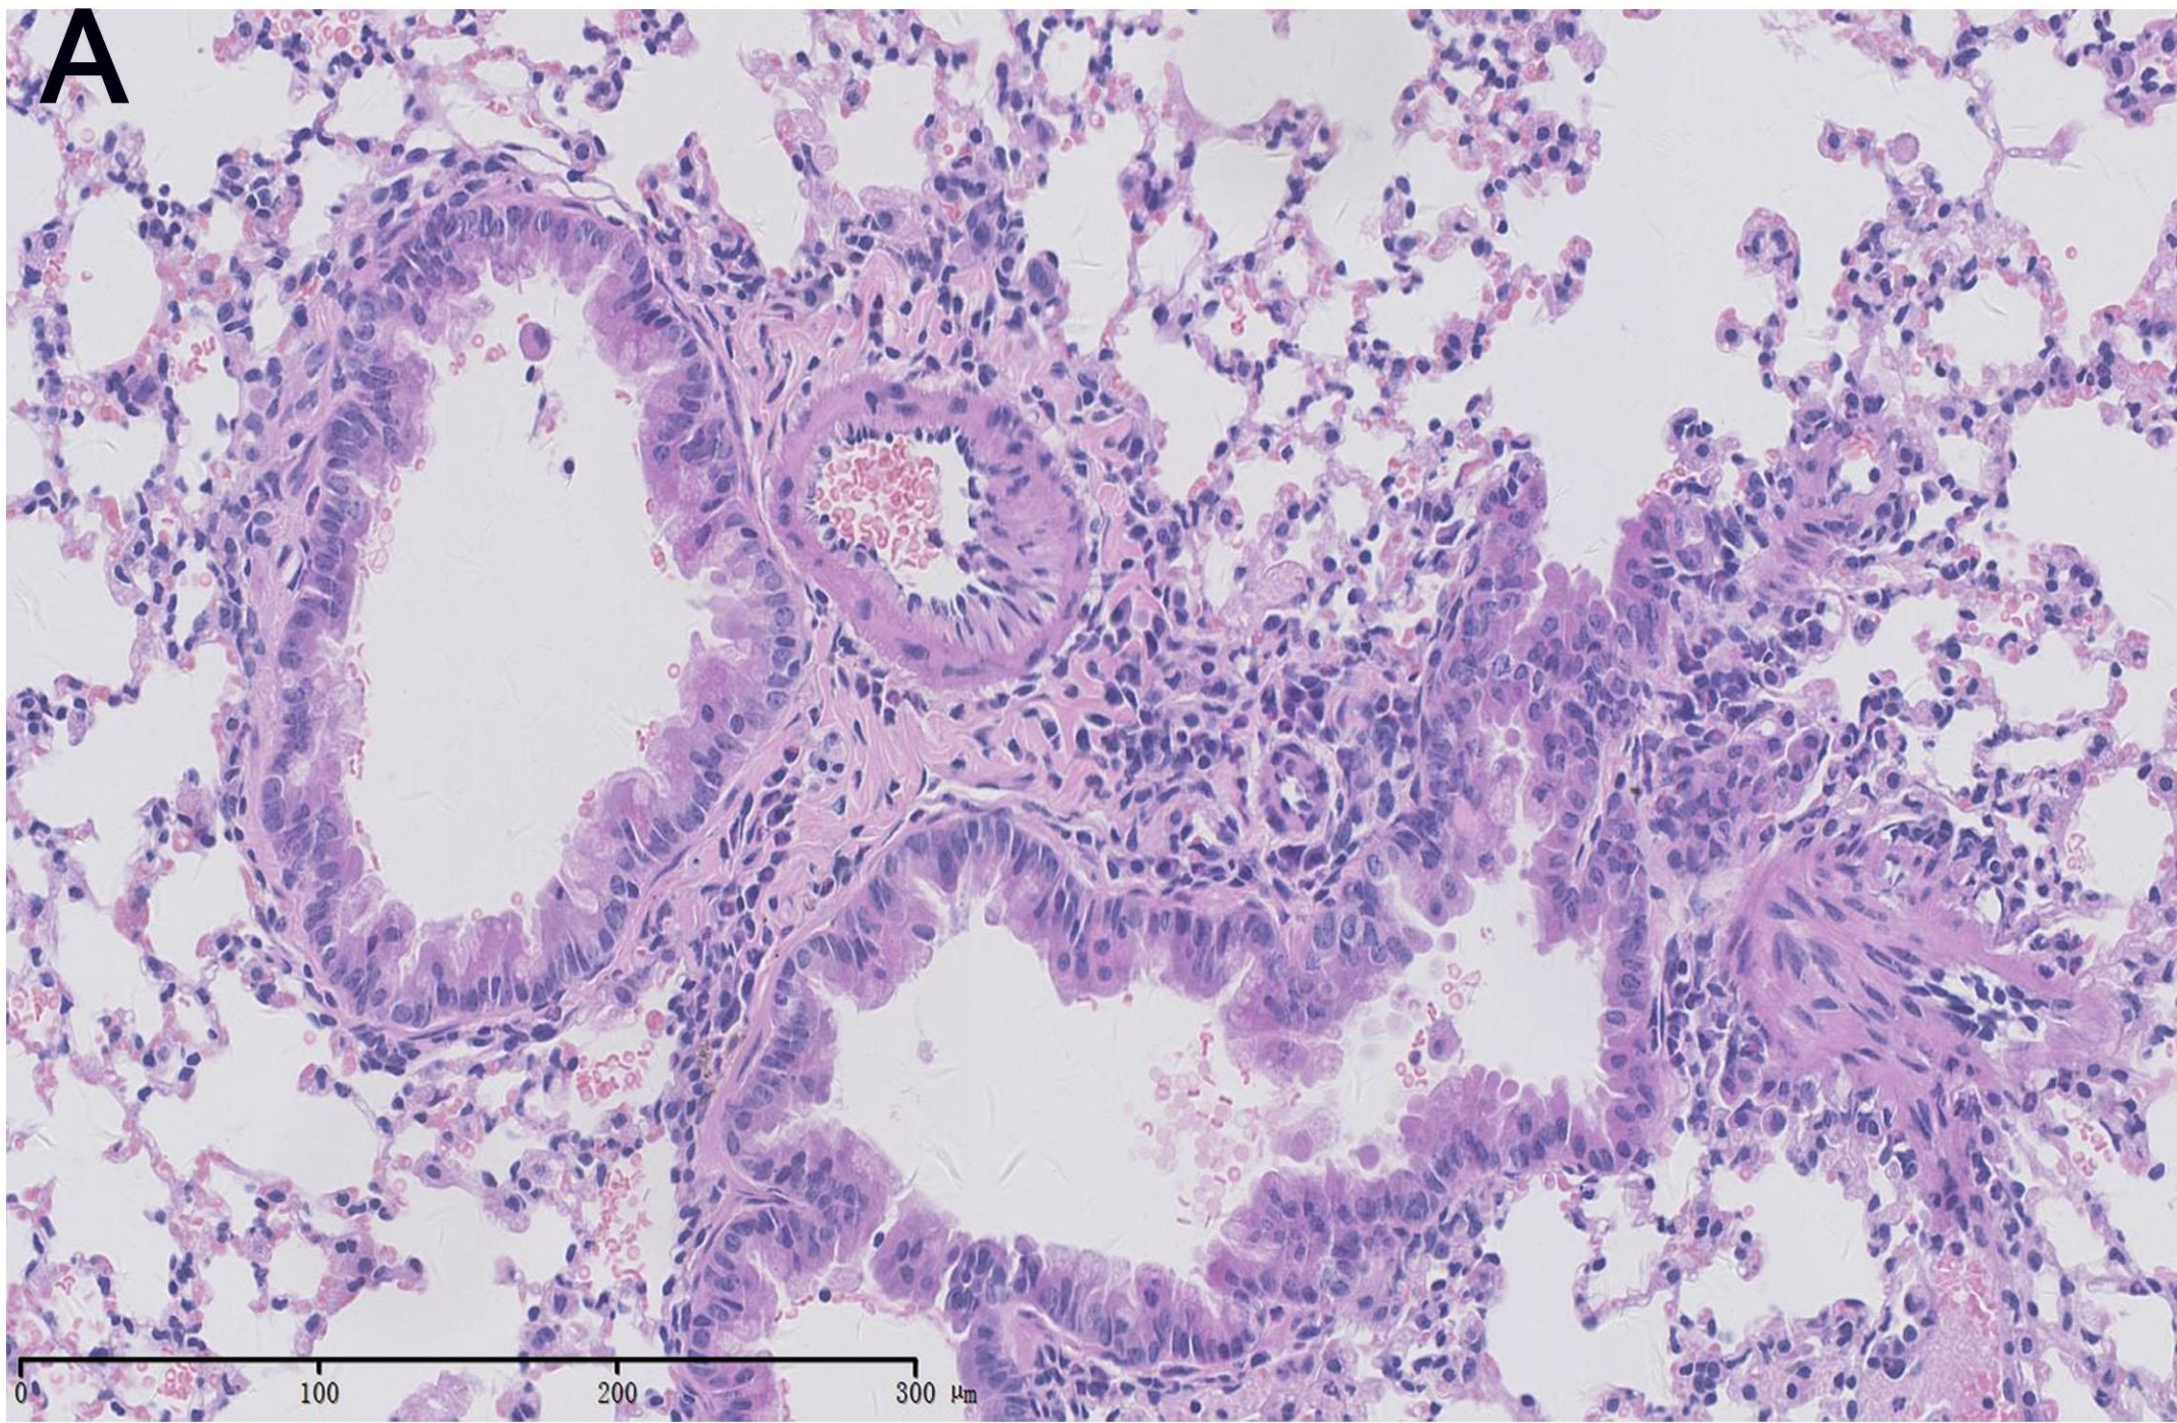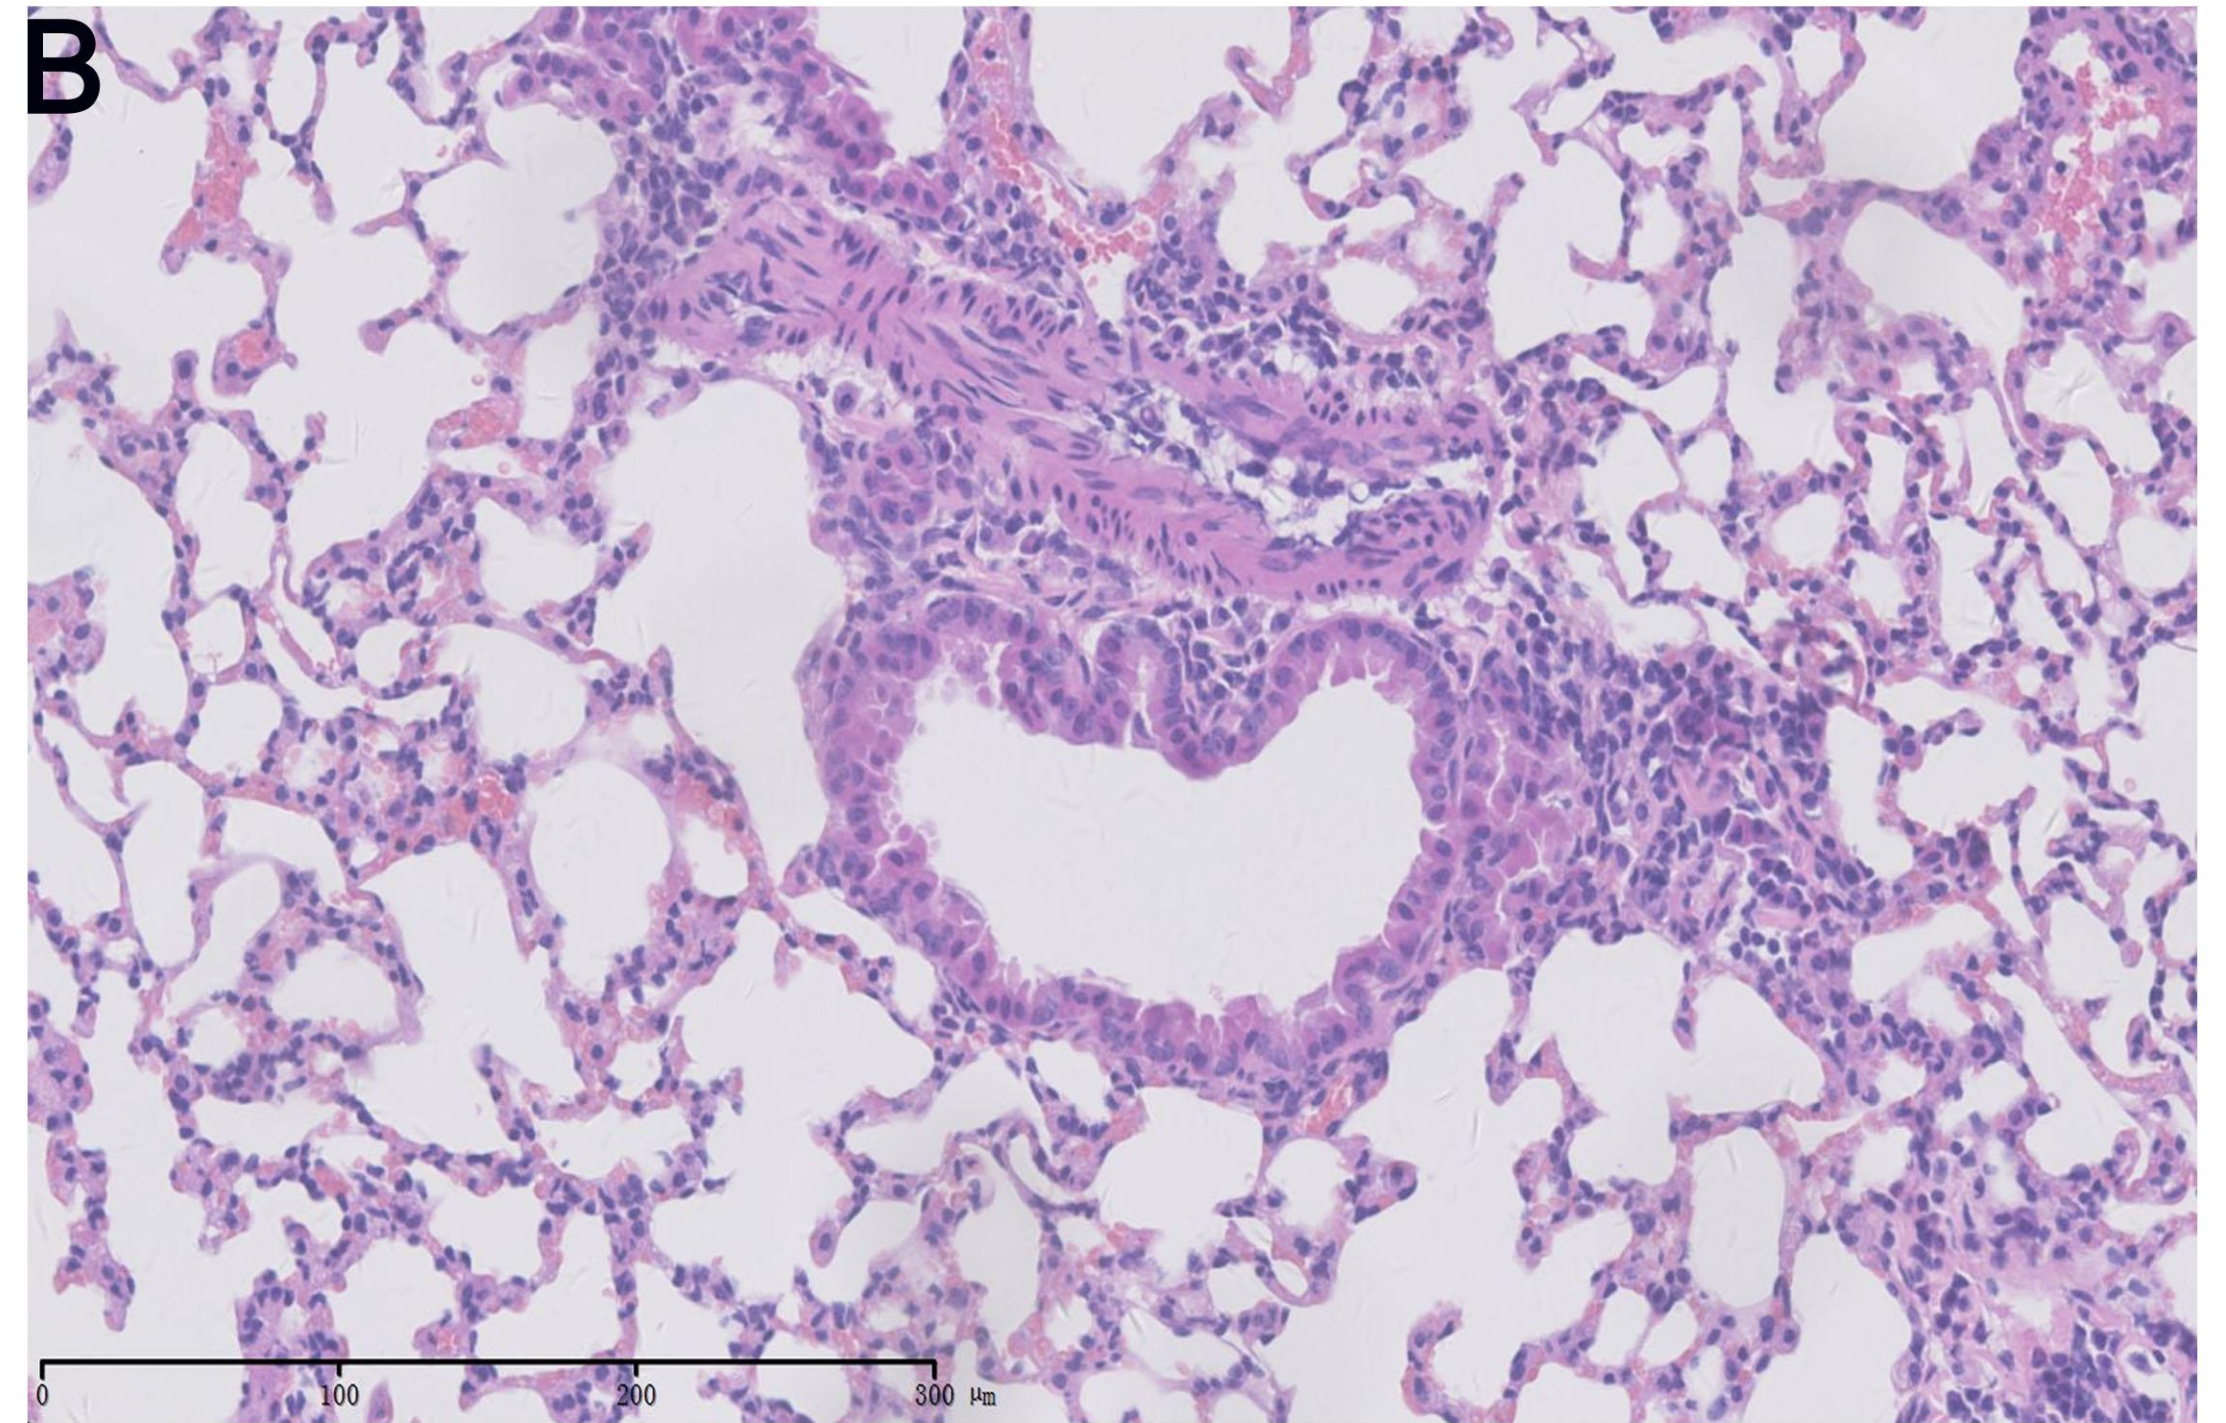

PAS

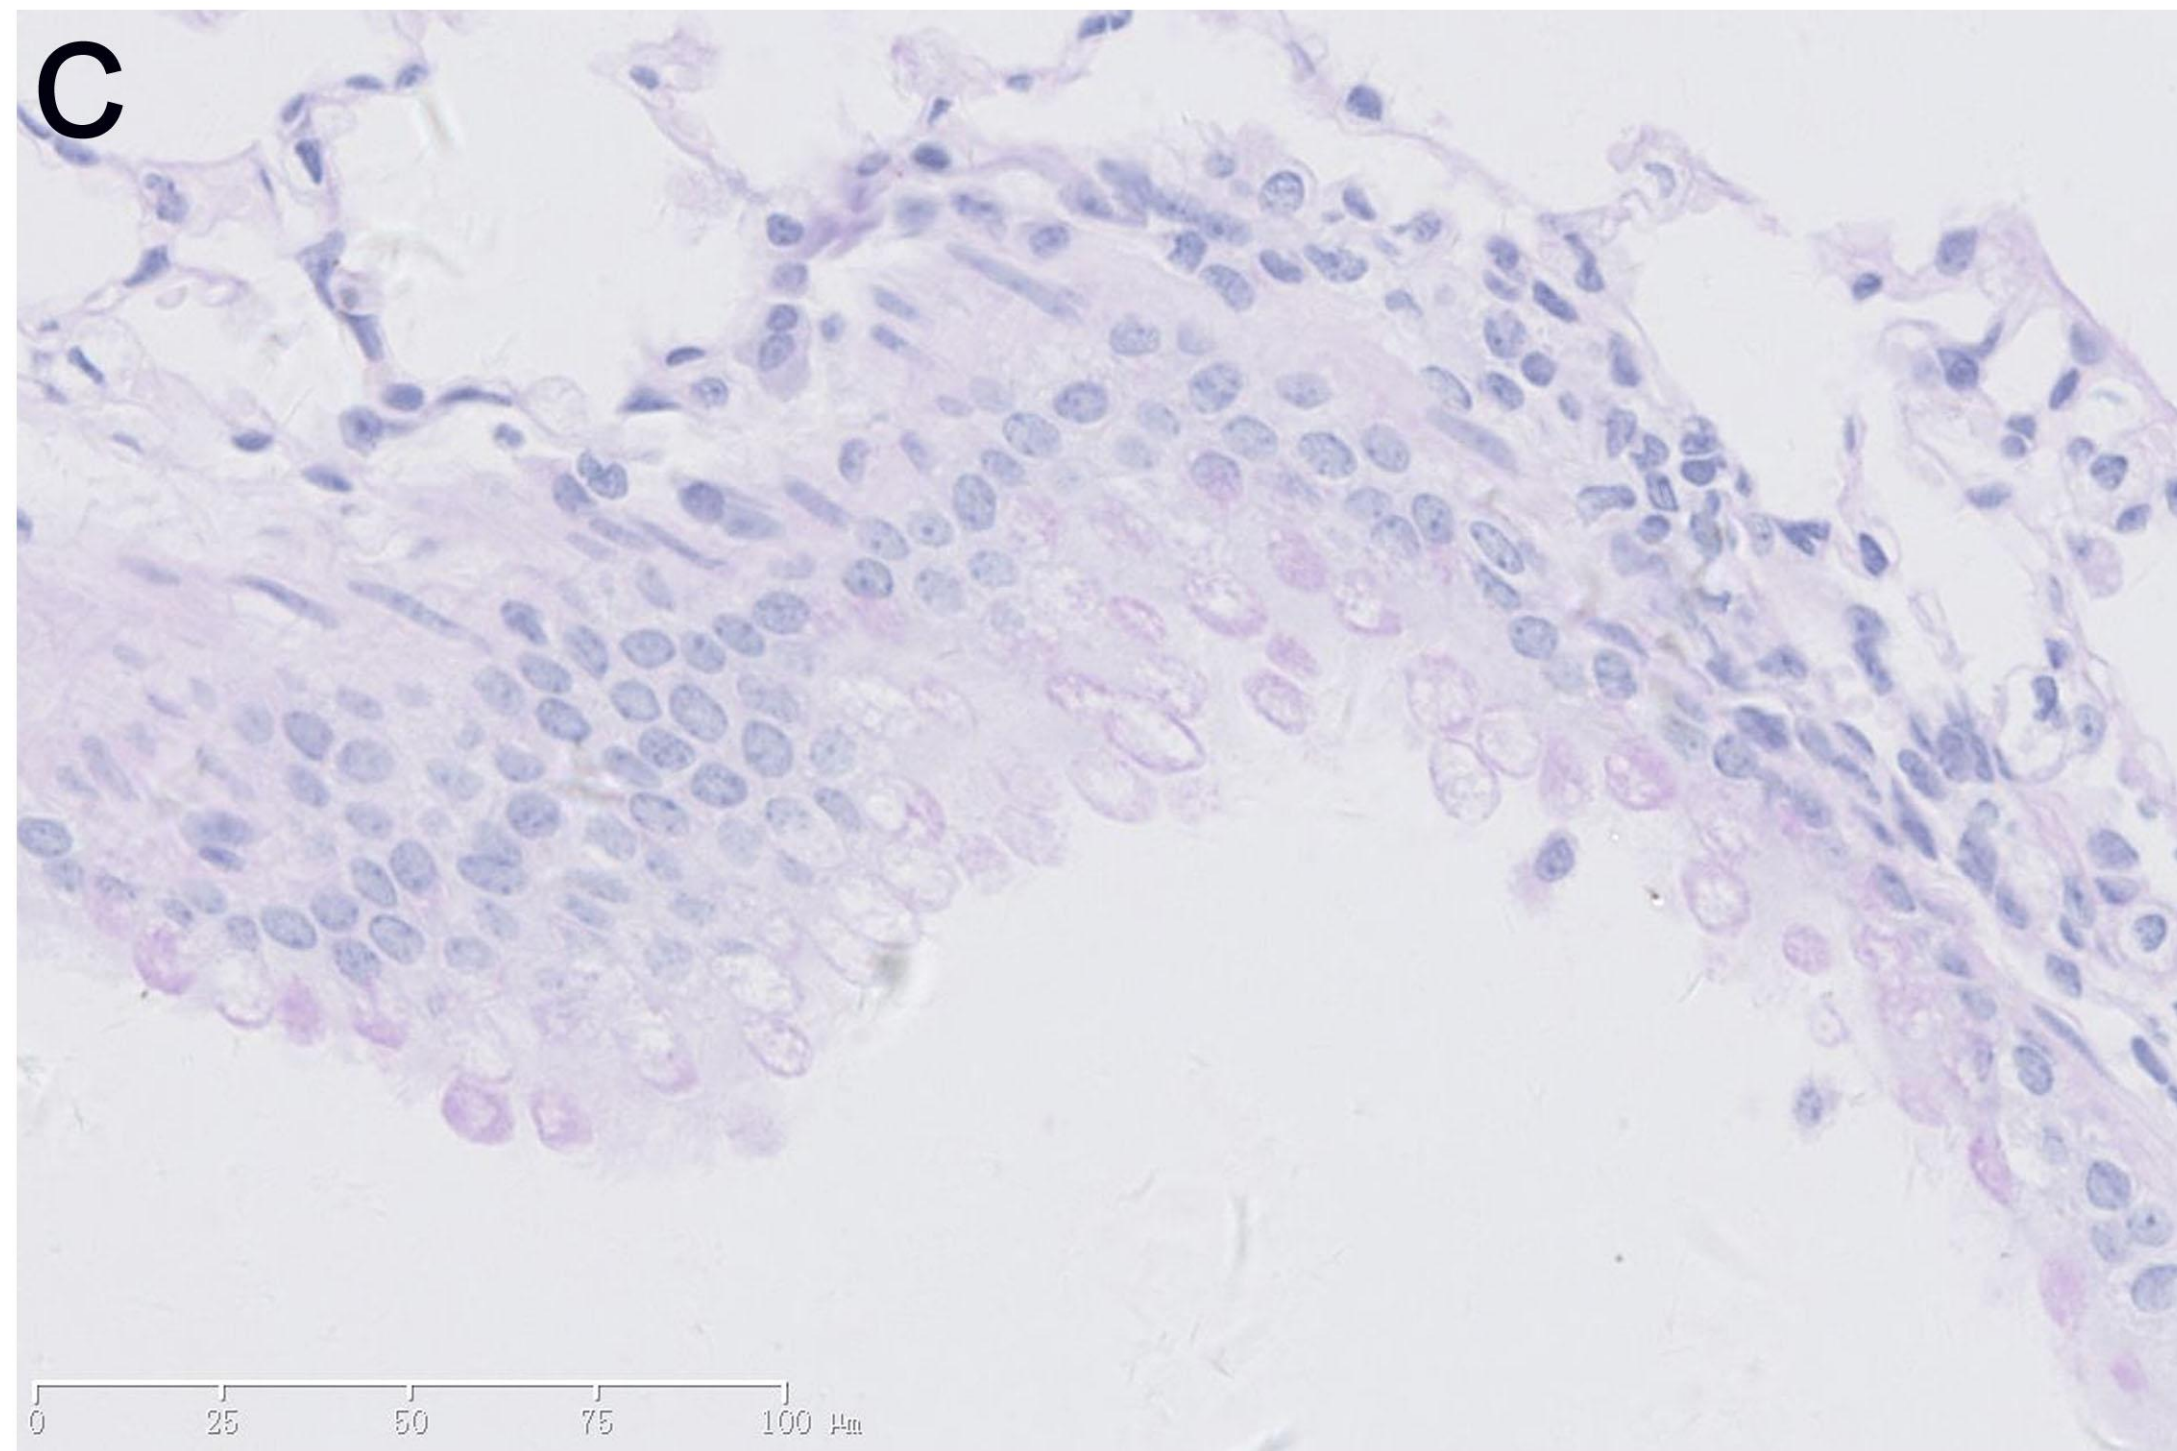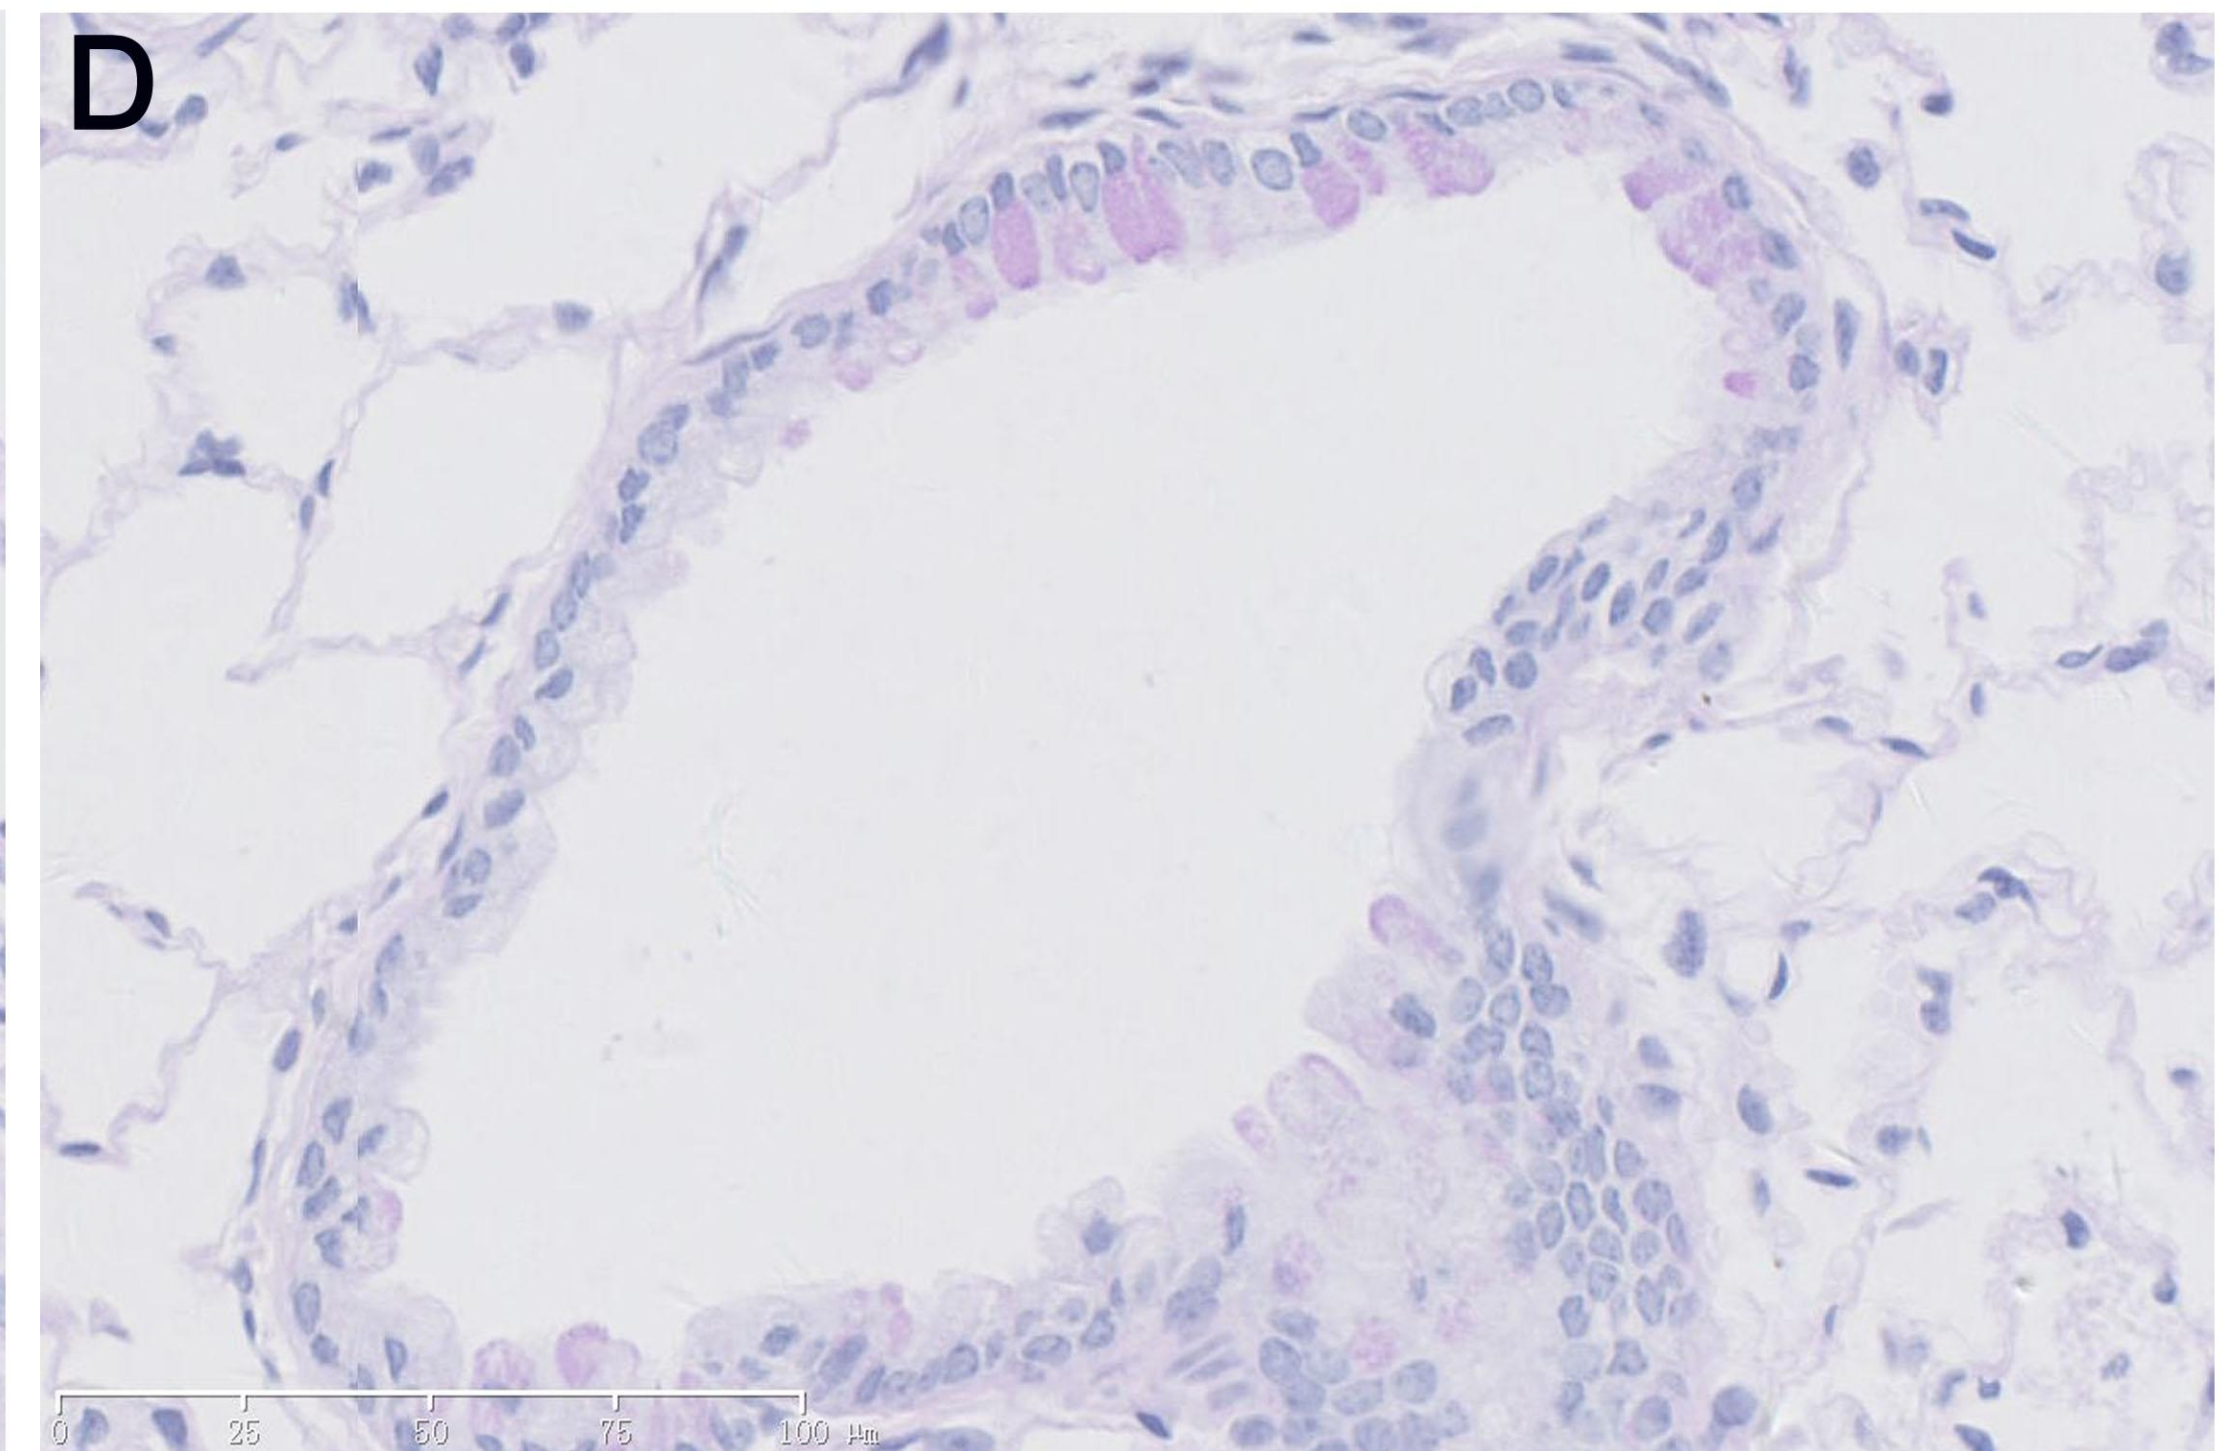

E

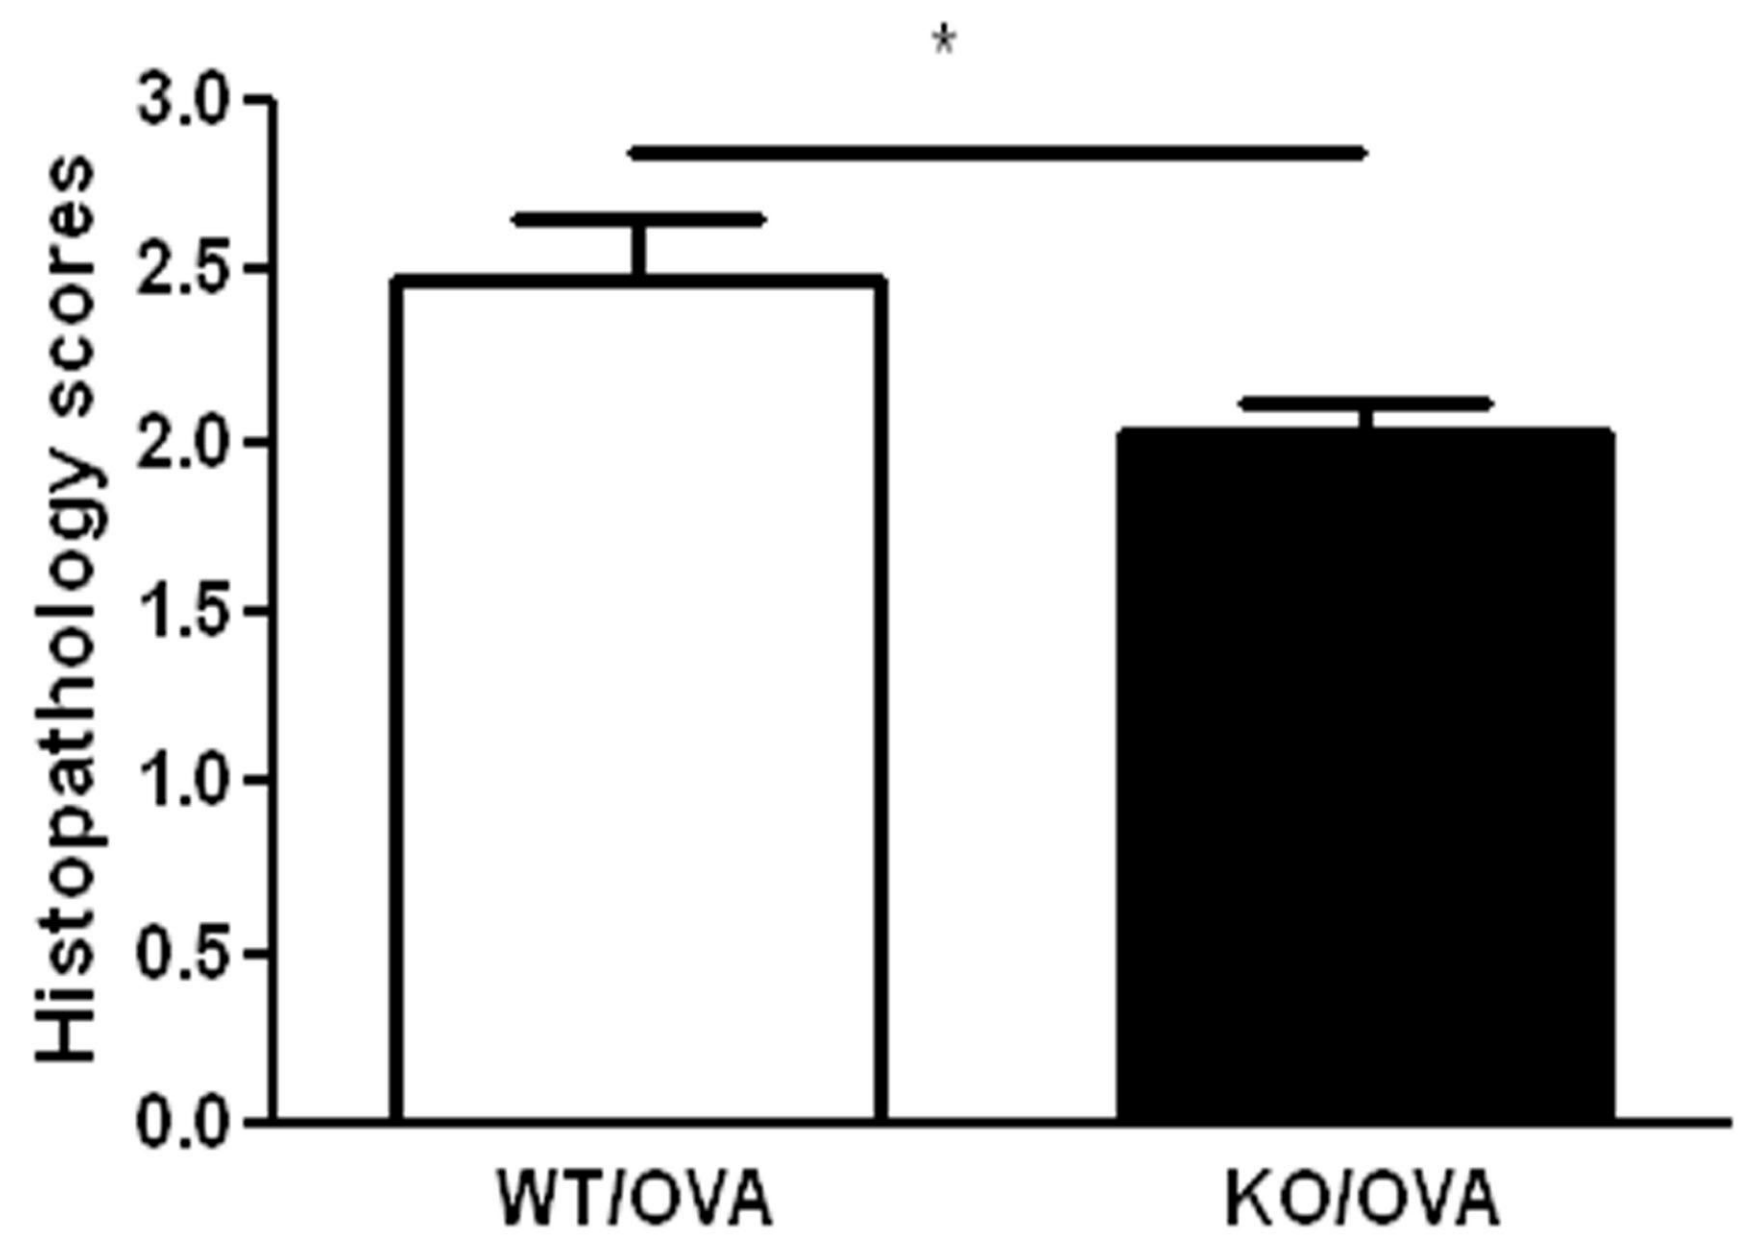

Supplement: MOESM2 [file 9425424]
